# Supplementary material
Source: Springer Nature journal article supplement (https://www.springermedizin.de/resource/supplementary/13221_2011_20_MOESM3_ESM.pdf/9680784)

**A** Control

Strained

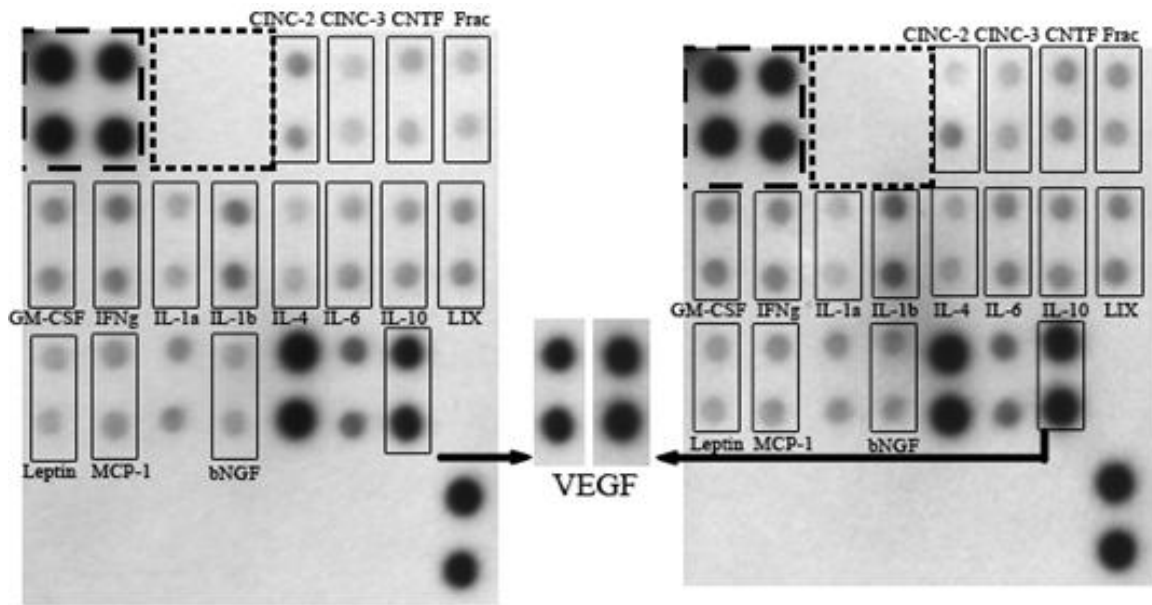

**B**

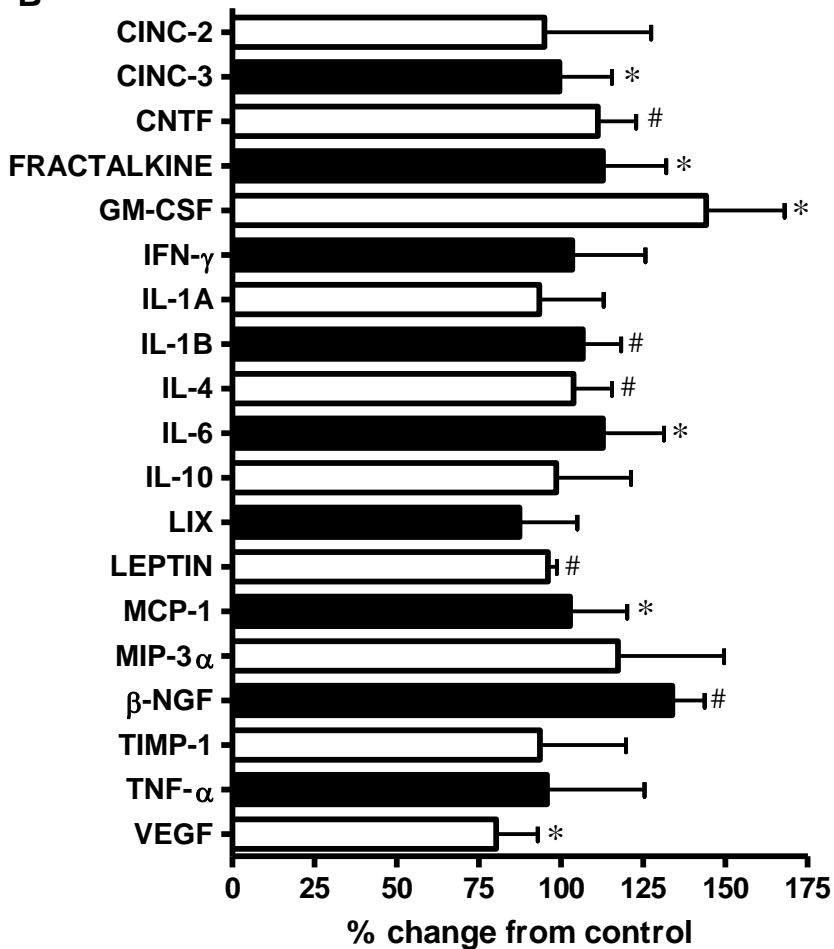

Supplement: MOESM3 [file 9680784]
